# Supplementary material for: Enhanced Serpent algorithm using Lorenz 96 Chaos-based block key generation and parallel computing for RGB image encryption
Source: PeerJ journal article supplement (doi:10.7717/peerj-cs.812), 2021-12-17
Supplement: Running_times_28_August.pdf [file Running_times_28_August.pdf]

## Running times

|            | Avg Enc time | Avg Dec time | File Size |
|------------|--------------|--------------|-----------|
| Baboon     | 2101.5       | 1897.1       | 160.1kB   |
| Cat1       | 1709.9       | 1507.6       | 101.1kB   |
| Cat2       | 1641.1       | 1462.7       | 66.7kB    |
| Chameleon  | 2554.1       | 2336.8       | 117.1kB   |
| Dog        | 2066.5       | 1875.3       | 88.0kB    |
| Eye        | 2117.8       | 1911.9       | 92.0kB    |
| Lenna      | 9580.4       | 9452.4       | 473.8kB   |
| Lighthouse | 3043.7       | 2701.7       | 137.1kB   |
| Pepper     | 10514        | 9548.1       | 44.0kB    |
| Tree       | 1691.2       | 1500.9       | 90.2kB    |
| Lennaorig  | 8056         | 7525.3       | 338.0kB   |

Memory: 8GB

Processor: Intel® Core™ i7-4500U CPU @ 1.80GHz × 4

Graphics: AMD® Hainan / Intel® HD Graphics 4400 (HSW GT2)

OS name: Pop!\_OS 21.04

OS type: 64-bit

Serpent Language: Java, openjdk version "11.0.11"

Analysis Language: Python 3.6

## Running times

File Dims in bits

225x225

200x200

211x185

252x253

240x210

236x225

512x512

279x266

512x512

200x200

440x439
